# Supplementary material
Source: Royal Society of Chemistry journal article supplement (doi:10.1039/d6lc00216a)
Supplement: d6lc00216a1.pdf [file d6lc00216a1.pdf]

## **Supplementary Information for Development of a 16-Channel Solid-State Nanopore Array Platform for Integrated Nanopore Fabrication and Ionic Current Measurement**

Itaru Yanagi\*<sup>1</sup>, Tadashi Kiyuna\*<sup>2</sup>, Keiko Esashika\*<sup>3</sup>, Yoshimitsu Yanagawa\*<sup>4</sup>,  
Hai Huy Nguyen Pham\*<sup>4</sup>, Daiki Kawai\*<sup>1</sup>, Satoshi Ogihara\*<sup>1</sup>, Gaku Ogino\*<sup>1</sup>,  
Ken-ichi Takeda\*<sup>4</sup> and Sotaro Uemura\*<sup>1</sup>

<sup>1</sup>Department of Biological Sciences, Graduate School of Science, The University of Tokyo, Tokyo,  
113-0033, Japan

<sup>2</sup>Hitachi Information & Telecommunication Engineering, Ltd, Yokohama, 220-6122, Japan

<sup>3</sup>Department of Electronics and Electrical Engineering, Keio University, Yokohama, 223-8522, Japan

<sup>4</sup>Healthcare Innovation Center, Research & Development Group, Hitachi, Ltd., Tokyo, 185-8603, Japan

The Supporting Information includes:

**SI-1. Schematic illustrations of the assembled flow cell and photographs of the membrane chips**

**SI-2. Representative screenshot of the control software**

**SI-3. Details of the main components used in the circuit board**

**SI-4. Flowchart of the MPVI procedure**

**SI-5. Summary of nanopore diameters and poly(dT)<sub>60</sub> translocation characteristics for each channel**

**SI-6. Relationships among pore diameter,  $\Delta I_P$ , and  $\Delta I_D$  for poly(dT)<sub>60</sub> translocation**

**SI-7. CBD characteristics of 20-nm-thick SiN membranes and distribution of the fabricated nanopore diameters**

**SI-8. Summary of nanopore diameters and 400 bp dsDNA translocation characteristics for each channel**

**SI-9. Relationships among pore diameter,  $\Delta I_P$ , and  $\Delta I_D$  for 400 bp dsDNA translocation**

**SI-10. Noise characteristics of the baseline current through nanopore membranes**

**SI-11. Open-input RMS current noise and RMS current noise with nanopores connected**

**SI-12. Verification of crosstalk in blockade-current signals between adjacent channels**

### SI-1. Schematic illustrations of the assembled flow cell and photographs of the membrane chips

Figure S-1(a) presents a schematic illustration of the assembled flow cell, and (b) shows the configuration with the electrode array. (c) Photographs of the front and back sides of a membrane chip.

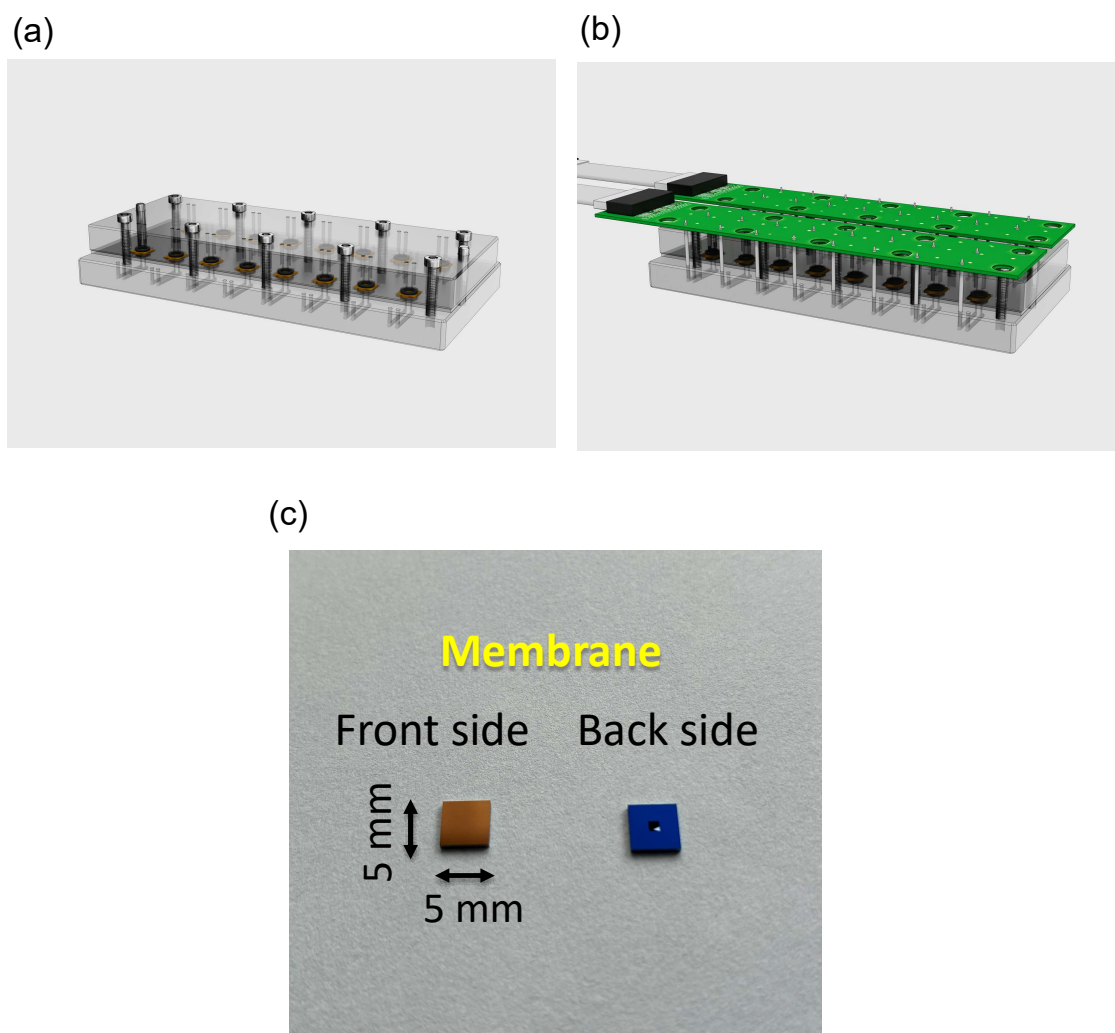

Figure S-1

## SI-2. Representative screenshot of the control software

Figure S-2 presents a partial screenshot of the custom-developed control software. The screenshot was captured during the simultaneous measurement of DNA translocation events through 16 nanopores. On the right side of the screen, ionic current traces from all 16 channels are displayed. The lower panel shows a 1 s magnified view of the ionic current trace from a selected channel. The left panel displays the power spectrum of the current from the selected channel.

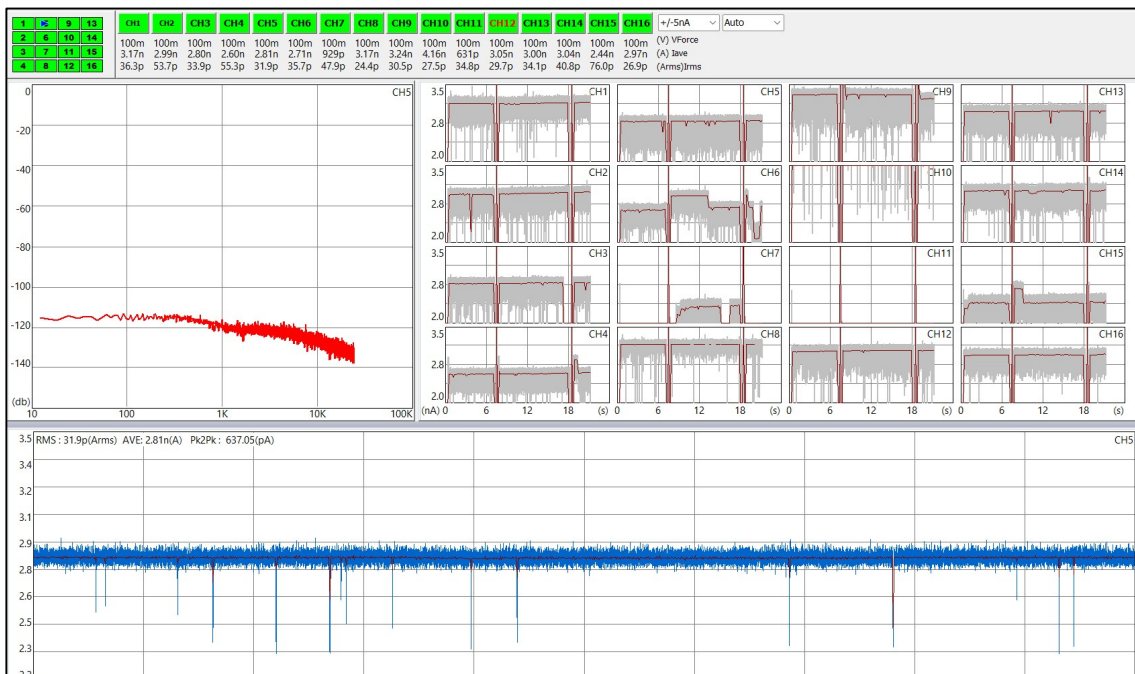

Figure S-2

### SI-3. Details of the main components used in the circuit board

A list of the main components used in the circuit board of the 16-channel measurement system is provided below.

Table S-1

| Function         | Parts Name | Parts number       | Supplier          | Quantity |
|------------------|------------|--------------------|-------------------|----------|
| Communication    | USB-IF     | FT232HL            | FTDI Chip         | 1        |
| Controller       | FPGA       | EP2C5T144C8N       | Altera            | 1        |
| Sub controller   | CPLD       | 5M160ZE64C5N       | Altera            | 6        |
| Voltage control  | DAC        | AD5754BREZ         | Analog Devices    | 5        |
| Isolation        | Isolator   | ISO7741DBQ         | Texas Instruments | 9        |
| Analog sensing   | ADC        | ADS8598HIPM        | Texas Instruments | 2        |
| Head amp.        | OPAMP      | OPA637AU           | Texas Instruments | 16       |
| Pore fab.        | Sub amp.   | OPA2191IDGKR       | Texas Instruments | 36       |
| Analog switch    | Switch     | ADG333ABRSZ        | Analog Devices    | 32       |
| Hi-res           | res        | CRHV1206AF1G00FKE5 | Vishay Techno     | 17       |
| Controller power | DC-DC      | R1SE-0505-R        | RECOM Power       | 1        |
| LDO              | LDO        | TLV71333PDBVR      | Texas instruments | 1        |
| LDO              | LDO        | TLV713185PDBVR     | Texas instruments | 1        |
| +/- 12V          | DC-DC      | LT3471EDD#PBF      | Linear Technology | 3        |
| Low noise LDO    | LDO        | TPS7A3001DRBT      | Texas instruments | 2        |
| Low noise LDO    | LDO        | TPS7A4701RGWT      | Texas Instruments | 3        |

#### SI-4. Flowchart of the MPVI procedure

Figure S-3 shows flowcharts of the nanopore generation (a) and widening (b) processes using MPVI.

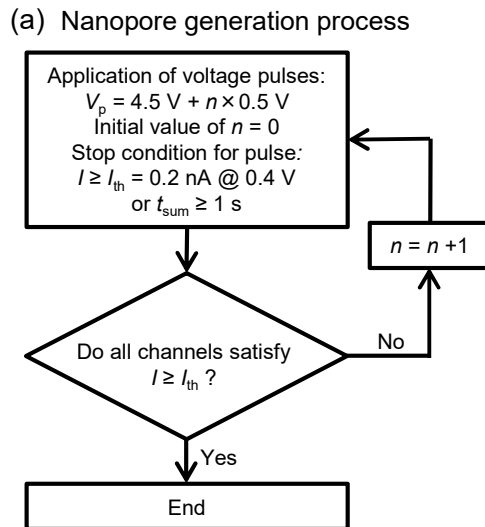

※Once  $I \geq I_{th}$  is satisfied, voltage pulses are no longer applied to that channel.

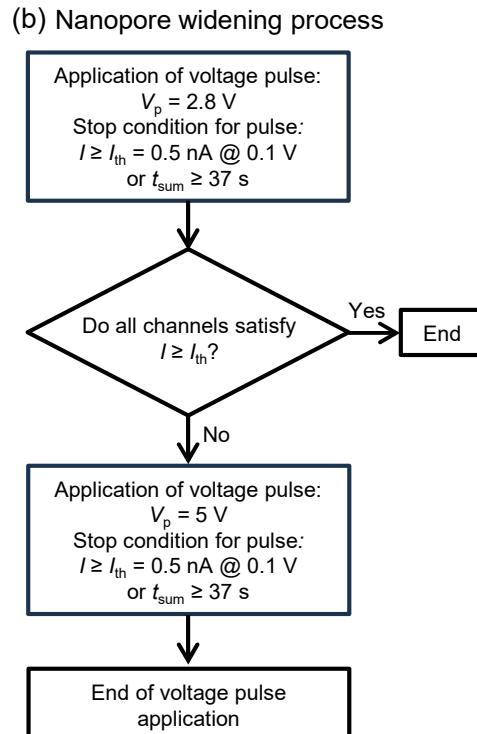

※Once  $I \geq I_{th}$  is satisfied, voltage pulses are no longer applied to that channel.

Figure S-3

**SI-5. Summary of nanopore diameters and poly(dT)<sub>60</sub> translocation characteristics for each channel**

Table S-2 summarizes the nanopore diameters and poly(dT)<sub>60</sub> translocation characteristics for each channel.  $\Delta I_p$  is defined as the highest peak of the smoothed  $\Delta I$  histogram.  $\Delta t_D$  and  $\Delta I_D$  are defined as the  $\Delta t$  and  $\Delta I$  values corresponding to the highest-density point in each  $\Delta t$ - $\Delta I$  scatter plot.

**Table S-2**

| Ch. # | Pore diameter (nm) | No. of events  | Event frequency (/s) | $\Delta I_p$ (nA) | $\Delta I_D$ (nA) | $\Delta t_D$ (ms) |
|-------|--------------------|----------------|----------------------|-------------------|-------------------|-------------------|
| 1     | 1.14               | 5365           | 62.4                 | 0.418             | 0.407             | 0.18              |
| 2     | 2.13               | 1603           | 12.4                 | 0.533             | 0.660             | 0.12              |
| 3     | 1.00               | 2756           | 22.4                 | 0.542             | 0.545             | 9.36              |
| 4     | 1.54               | 3206           | 19.2                 | 0.737             | 0.708             | 0.24              |
| 5     | 1.76               | 365            | 3.2                  | 0.551             | 0.552             | 0.12              |
| 6     | 1.39               | 2523           | 20.7                 | 0.686             | 0.676             | 0.46              |
| 7     | 2.05               | 902            | 18.0                 | 0.523             | 0.487             | 0.12              |
| 8     | 0.69               | Too few events | N/A                  | N/A               | N/A               | N/A               |
| 9     | 0.48               | Too few events | N/A                  | N/A               | N/A               | N/A               |
| 10    | 0.12               | Too few events | N/A                  | N/A               | N/A               | N/A               |
| 11    | 1.35               | Too few events | N/A                  | N/A               | N/A               | N/A               |
| 12    | 1.30               | 3316           | 21.1                 | 0.628             | 0.623             | 1.38              |
| 13    | 0.89               | Too few events | N/A                  | N/A               | N/A               | N/A               |
| 14    | 1.49               | 3090           | 34.7                 | 0.690             | 0.681             | 0.24              |
| 15    | 2.05               | 1931           | 12.1                 | 0.526             | 0.637             | 0.1               |
| 16    | 1.44               | 6349           | 39.7                 | 0.727             | 0.726             | 1.26              |

### SI-6. Relationships among pore diameter, $\Delta I_P$ , and $\Delta I_D$ for poly(dT)<sub>60</sub> translocation

Figure S-4(a) presents the dependence of  $\Delta I_P$  on nanopore diameter ( $\phi$ ). The tendency for  $\Delta I_P$  to reach a maximum near 1.5 nm is consistent with the  $\Delta I_D$  versus  $\phi$  trend shown in Fig. 6(b) of the main text. Figure S-4(b) presents the relationship between  $\Delta I_P$  and  $\Delta I_D$ . For most channels,  $\Delta I_P$  and  $\Delta I_D$  are in close agreement.

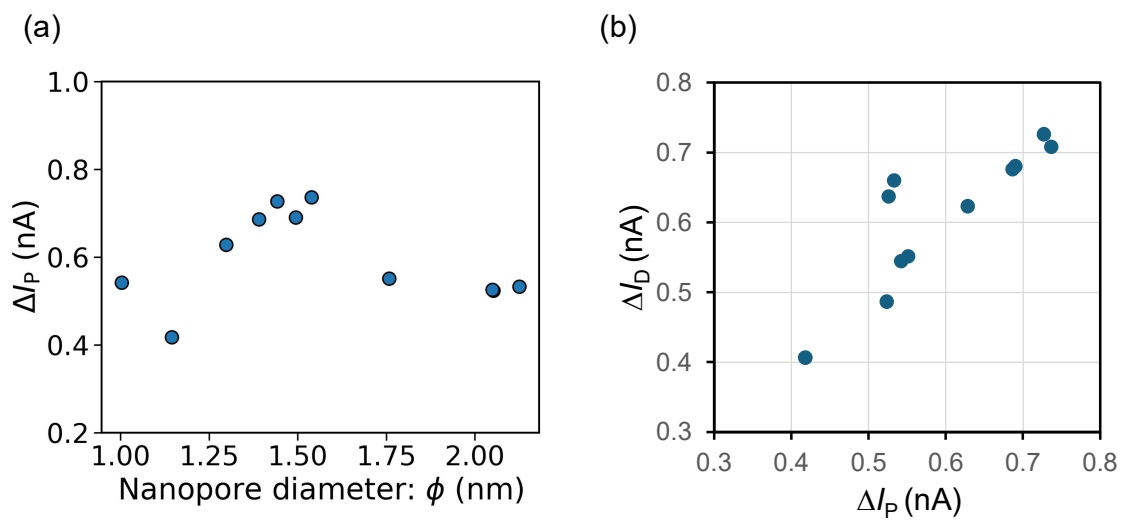

Figure S-4

### **SI-7. CBD characteristics of 20-nm-thick SiN membranes and distribution of the fabricated nanopore diameters**

Figure S-5(a) shows the CBD characteristics of all 16 channels for nanopore fabrication in 20-nm-thick SiN membranes, from the dielectric breakdown point to the end-of-NP-fabrication point. The experiment was performed in KCl aqueous solution at pH 12.7 by applying -18 V to each *trans* chamber with the threshold current set to  $I_{th} = 600$  nA. Figure S-5(b) shows the  $I-V$  characteristics of all 16 channels after CBD. Figure S-5(c) shows the estimated diameters of the fabricated nanopores, calculated from the current values at 0.1 V using eqn (1), presented as box-and-whisker plots together with those for the 14-nm-thick SiN membranes shown in Fig. 8 in the main text. Excluding outliers, the variation in the fabricated nanopore diameters is very small for both the 20-nm-thick and 14-nm-thick membranes, remaining within 2 nm.

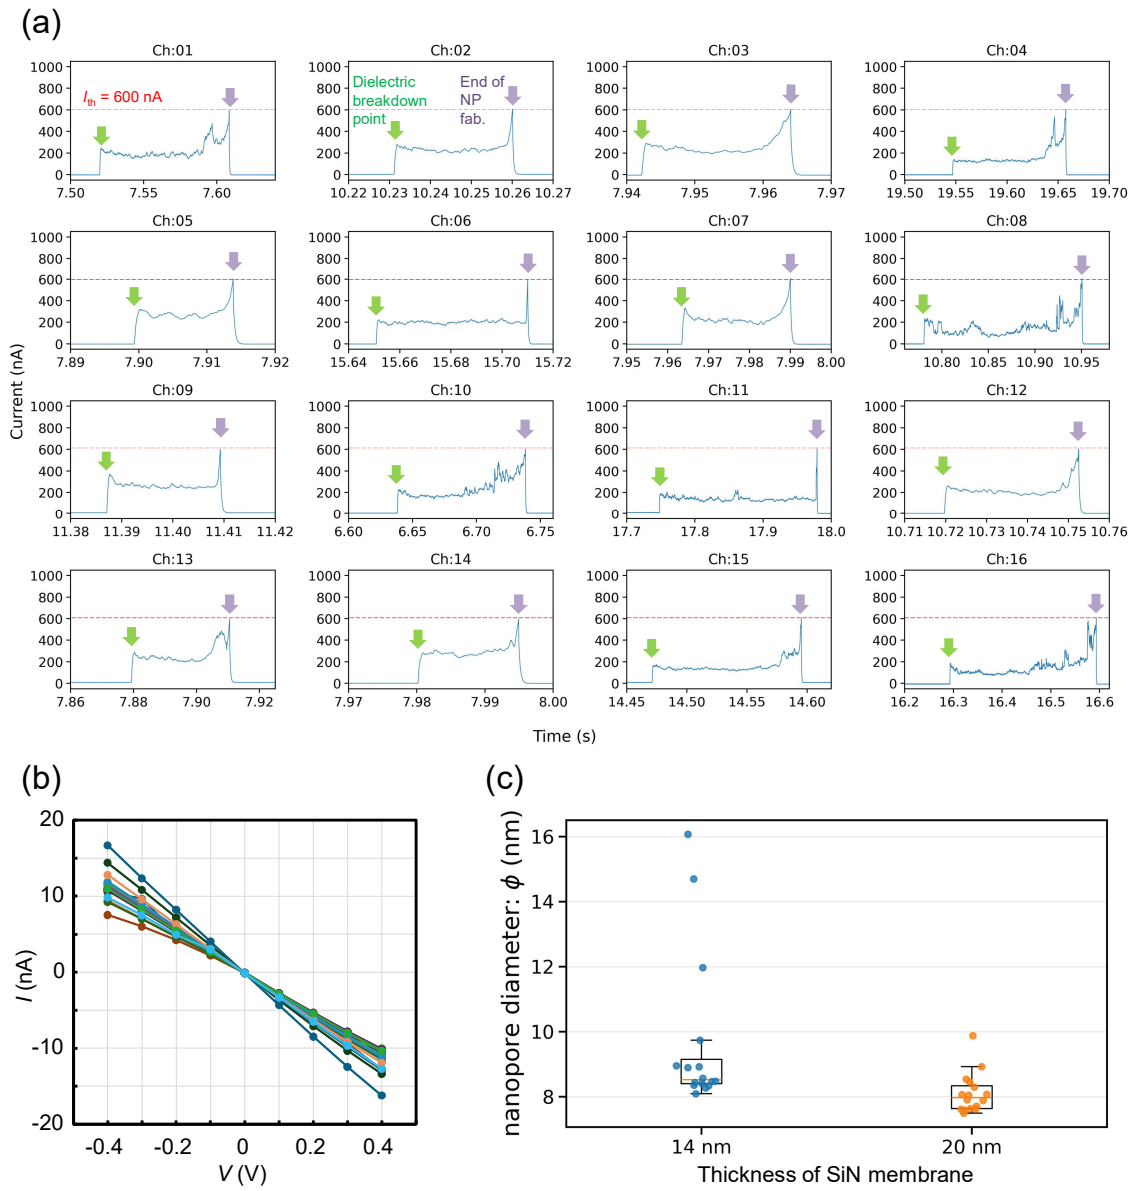

Figure S-5

**SI-8. Summary of nanopore diameters and 400 bp dsDNA translocation characteristics for each channel**

Table S-3 summarizes the nanopore diameters and 400 bp dsDNA translocation characteristics for each channel.  $\Delta I_P$  is defined as the highest peak of the smoothed  $\Delta I$  histogram.  $\Delta t_D$  and  $\Delta I_D$  are defined as the  $\Delta t$  and  $\Delta I$  values corresponding to the highest-density point in each  $\Delta t$ - $\Delta I$  scatter plot.

**Table S-3**

| Ch. # | Pore diameter (nm) | No. of events | Event frequency (/s) | $\Delta I_P$ (nA) | $\Delta I_D$ (nA) | $\Delta t_D$ (ms) |
|-------|--------------------|---------------|----------------------|-------------------|-------------------|-------------------|
| 1     | 9.31               | 7560          | 29.65                | 0.597             | 0.565             | 0.14              |
| 2     | 10.69              | 1168          | 30.74                | 0.593             | 0.567             | 0.18              |
| 3     | 9.33               | 6128          | 23.21                | 0.568             | 0.491             | 0.14              |
| 4     | 13.87              | 9069          | 34.35                | 0.604             | 0.408             | 0.1               |
| 5     | 9.09               | 8690          | 32.92                | 0.637             | 0.599             | 0.18              |
| 6     | 9.34               | 5696          | 21.58                | 0.608             | 0.578             | 0.16              |
| 7     | 9.39               | 4196          | 15.89                | 0.556             | 0.478             | 0.14              |
| 8     | 9.81               | 2284          | 8.65                 | 0.467             | 0.416             | 0.1               |
| 9     | 9.47               | 6506          | 24.64                | 0.563             | 0.473             | 0.14              |
| 10    | 18.84              | 6078          | 24.81                | 0.466             | 0.434             | 0.12              |
| 11    | 9.60               | 734           | 2.78                 | 0.532             | 0.452             | 0.14              |
| 12    | 10.28              | 5507          | 81.89                | 0.466             | 0.443             | 0.12              |
| 13    | 10.83              | 2238          | 74.60                | 0.680             | 0.679             | 2.98              |
| 14    | 9.66               | 708           | 2.78                 | 0.512             | 0.468             | 0.14              |
| 15    | 9.10               | 4497          | 17.64                | 0.743             | 0.707             | 0.14              |
| 16    | 16.28              | 4849          | 69.27                | 0.754             | 0.731             | 0.12              |

### SI-9. Relationships among pore diameter, $\Delta I_P$ , and $\Delta I_D$ for 400 bp dsDNA translocation

Figure S-6(a) presents the dependence of  $\Delta I_P$  on nanopore diameter ( $\phi$ ). The trend is similar to that shown in Fig. 11 of the main text, and no clear dependence on pore diameter is observed. Figure S-6(b) presents the relationship between  $\Delta I_P$  and  $\Delta I_D$ . For most channels,  $\Delta I_P$  and  $\Delta I_D$  are in close agreement.

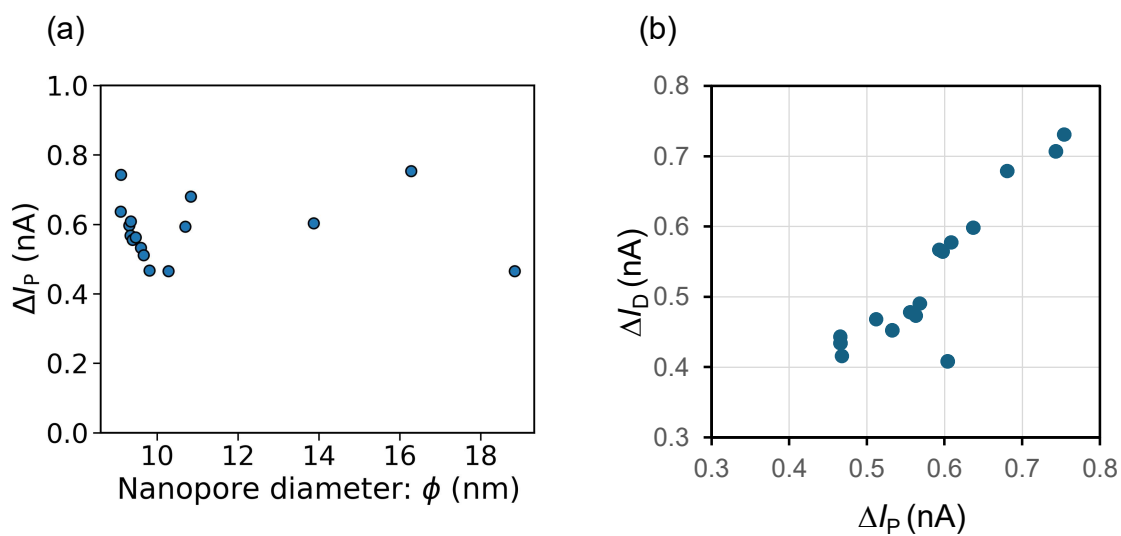

Figure S-6

## SI-10. Noise characteristics of the baseline current through nanopore membranes

Figure S-7(a) shows a typical ionic current through a nanopore formed in a 5-nm-thick SiN membrane fabricated using the poly-Si sacrificial layer process, while Figure S-7(b) shows the ionic current through a nanopore formed in a 14-nm-thick SiN membrane fabricated using the SiO<sub>2</sub> sacrificial layer process. The nanopore diameters were 1.26 nm for (a) and 9.65 nm for (b). The aqueous solutions were 1 M KCl at pH 8.7 for (a) and 1 M KCl at pH 7.5 for (b), and the applied voltage was 0.1 V in both cases. Figure S-7(c) shows the noise power spectra for the two cases. As described in our previous report [1], membranes fabricated using the SiO<sub>2</sub> sacrificial layer process have lower capacitance than those fabricated using the poly-Si sacrificial layer process, resulting in lower noise.

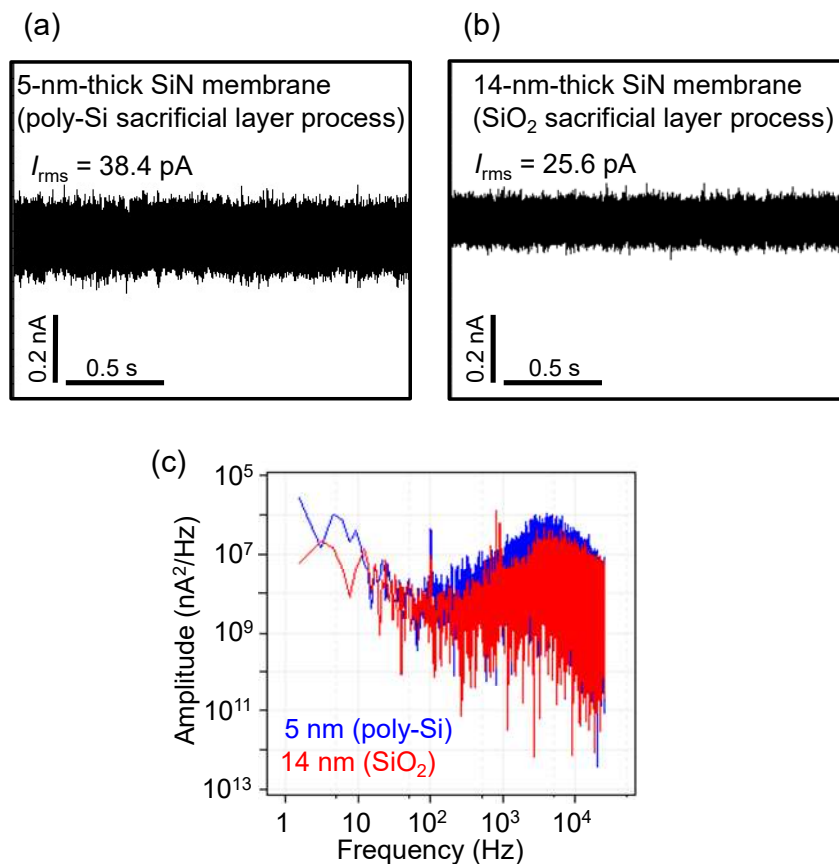

Figure S-7

**SI-11. Open-input RMS current noise and RMS current noise with nanopores connected**

Tables S-4(a) and S-4(b) show, respectively, the open-input RMS current noise and the RMS current noise with nanopores connected, both measured in the 16-channel measurement system. In each table, the values are listed for the case where all 16 channels were operated simultaneously (16 ch active) and for the case where only the individual channel under measurement was operated (1 ch active; the other 15 channels were disabled). It was confirmed that there were no large differences in RMS current noise among the channels, and that there was almost no difference in RMS current noise between the 16 ch active and 1 ch active conditions. The applied voltage was 0.1 V for both Tables S-4(a) and S-4(b). For the measurement in Table S-4(b), nanopores formed in 14-nm-thick SiN membranes were used, and the aqueous solution used was 1 M KCl at pH 8.7.

**Table S-4 (a)**

| ch | Irms (pA)<br>@ 16 ch active | Irms (pA)<br>@ 1 ch active |
|----|-----------------------------|----------------------------|
| 1  | 3.43                        | 3.38                       |
| 2  | 1.94                        | 2.15                       |
| 3  | 2.4                         | 2.87                       |
| 4  | 2.09                        | 2.58                       |
| 5  | 3.05                        | 3.1                        |
| 6  | 2.36                        | 2.67                       |
| 7  | 2.22                        | 2.57                       |
| 8  | 2.68                        | 2.54                       |
| 9  | 2.28                        | 3.05                       |
| 10 | 3.07                        | 3.1                        |
| 11 | 2.21                        | 2.37                       |
| 12 | 2.32                        | 2.75                       |
| 13 | 3.26                        | 3.22                       |
| 14 | 3.02                        | 3.08                       |
| 15 | 3.39                        | 3.68                       |
| 16 | 3.4                         | 3.46                       |

**Table S-4 (b)**

| ch | Irms (pA)<br>@ 16 ch active | Irms (pA)<br>@ 1 ch active | pore diameter<br>(nm) |
|----|-----------------------------|----------------------------|-----------------------|
| 1  | 27.8                        | 27.7                       | 11.4                  |
| 2  | 25.5                        | 25.1                       | 15.1                  |
| 3  | 24.2                        | 23.3                       | 11.2                  |
| 4  | 24.3                        | 24                         | 9.75                  |
| 5  | 26.4                        | 26.3                       | 10.7                  |
| 6  | 26.4                        | 26.6                       | 12.4                  |
| 7  | 27.3                        | 25.6                       | 10.5                  |
| 8  | 25.7                        | 25.9                       | 11                    |
| 9  | 22.5                        | 22.8                       | 10.6                  |
| 10 | 26.1                        | 26.9                       | 11.1                  |
| 11 | 24                          | 23.2                       | 11.7                  |
| 12 | 25.3                        | 24.9                       | 10.2                  |
| 13 | 29.6                        | 29.4                       | 10.2                  |
| 14 | 26.3                        | 25.9                       | 11.7                  |
| 15 | 28.2                        | 27.8                       | 14.1                  |
| 16 | 24.9                        | 23.4                       | 10.9                  |

## SI-12. Verification of crosstalk in blockade-current signals between adjacent channels

Figures S-8(a) and (b) show enlarged views of the current traces for ch5 and ch6, and for ch9 and ch10, respectively, from the measurements presented in Figure 9 of the main text, during periods in which a blockade current was observed in one of the two channels. As shown in the figures, when a blockade current was observed in one channel, no correlated fluctuation was observed in the adjacent channel, indicating the absence of inter-channel crosstalk in the blockade-current signal.

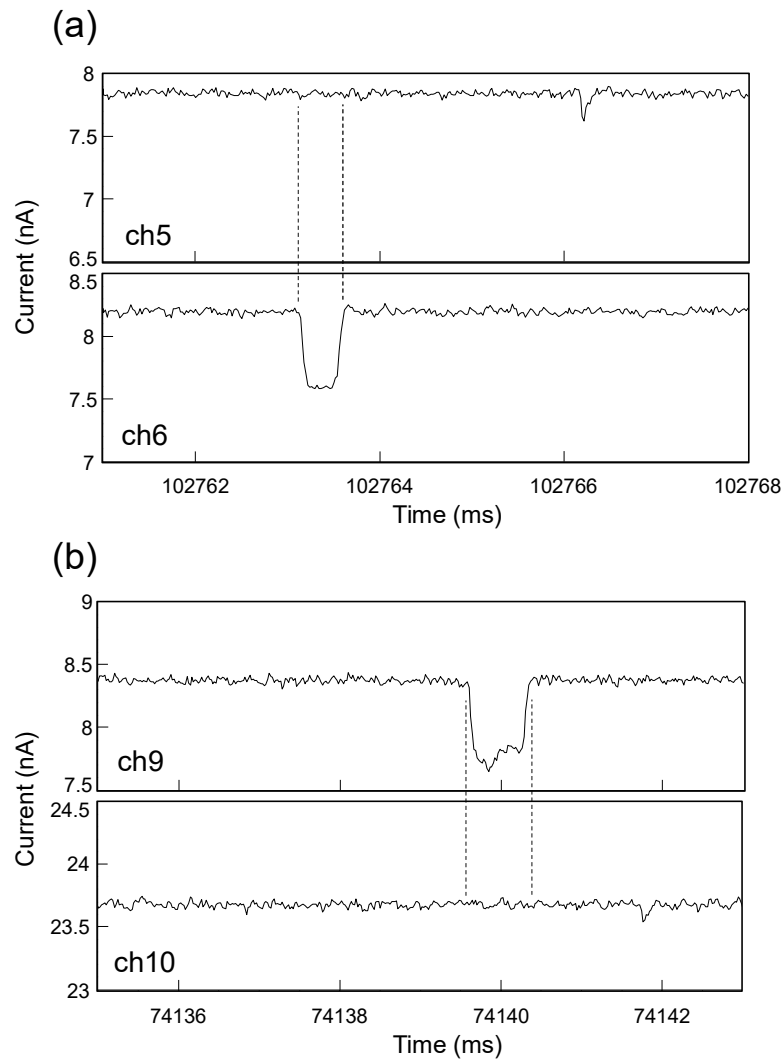

Figure S-8

## References

- [1] I. Yanagi and K. Takeda, *Nanotechnology*, 2021, 32, 415301.
